# Supplementary material for: Criteria for Verification and Replanning Based on the Adaptive Radiotherapy Protocol “Best for Adaptive Radiotherapy” in Head and Neck Cancer
Source: MDPI journal article supplement (doi:10.3390/life12050722), 2022-05-12
Supplement: s1 [file s1]

**Table S2.** Adaptive Radiotherapy Risk Profile

| Adaptive strategy – Risk Profile |                           |                                                                                                                                           |                                                                                                                                           |
|----------------------------------|---------------------------|-------------------------------------------------------------------------------------------------------------------------------------------|-------------------------------------------------------------------------------------------------------------------------------------------|
|                                  | Low risk                  | Intermediate risk                                                                                                                         | High risk                                                                                                                                 |
| Tumor localization               | NCC/MS//HPC               | NPC/OPC/L                                                                                                                                 | NPC/OPC/OCC/L                                                                                                                             |
| Loose mask                       |                           | Loose mask detected in weeks 3-4                                                                                                          | Loose mask detected during week 1                                                                                                         |
| BMI/B-body                       | If initial weight <100 kg | If initial weight <100 kg                                                                                                                 | Initial weight >100 kg                                                                                                                    |
| CHRT                             |                           | no chemoradiation                                                                                                                         | chemoradiation                                                                                                                            |
| Postoperative RT                 |                           | No                                                                                                                                        | Yes                                                                                                                                       |
| Stage                            | T1/N0                     | T2-T3 / <N1                                                                                                                               | T3-T4 / N1-N3                                                                                                                             |
| Parotid Glands                   |                           | parotid glands also move to the body midline during radiation therapy                                                                     | parotid glands also move to the body midline during radiation therapy                                                                     |
|                                  |                           | difference between the planning scan and the CBCT/MVCT are greater than 3mm on 3-4 consecutive scans at any point of the external contour | difference between the planning scan and the CBCT/MVCT are greater than 3mm on 3-4 consecutive scans at any point of the external contour |
| Nodal Status                     |                           | Dominant pretreatment nodal in region II-IV                                                                                               | Dominant pretreatment nodal in region II-IV                                                                                               |
|                                  |                           |                                                                                                                                           | CTV moves outside the body during treatment                                                                                               |
|                                  |                           |                                                                                                                                           | CTV covering more than 10% of initial PG volume                                                                                           |
| PTV                              |                           |                                                                                                                                           | PTV outside the Body during treatment >3mm on 3-4 consecutive scans                                                                       |
| Suggested control Replan-CT      | Observation               | 2-5th week of treatment                                                                                                                   | 3-5th week of treatment                                                                                                                   |

**Abbreviations:** H&N, head and neck; PG, parotid gland; CTV, clinical target volume; PTV, planning target volume; BMI, body mass index; CHRT, chemoradiotherapy; OPC, oropharyngeal cancer; OCC, oral cavity cancers; and Other (NPC, nasopharynx, L=larynx, HPC=hypopharynx, CUP=cancer of unknown primary, NCC=nasal cavity cancer, MS=maxillary sinus cancer).
