# Supplementary material for: Criteria for Verification and Replanning Based on the Adaptive Radiotherapy Protocol “Best for Adaptive Radiotherapy” in Head and Neck Cancer
Source: MDPI journal article supplement (doi:10.3390/life12050722), 2022-05-12
Supplement: s1 [file s1]

**Table S1.** Replanning decision timing

| Decision of replanning<br>by phase of treatment |    |            | Initiation of replanning<br>by phase of treatment |    |            |
|-------------------------------------------------|----|------------|---------------------------------------------------|----|------------|
| Phase                                           | N  | % of Total | Phase                                             | N  | % of Total |
| 1                                               | 77 | 93.9 %     | 1                                                 | 26 | 31.7 %     |
| 2                                               | 5  | 6.1 %      | 2                                                 | 51 | 62.2 %     |
| 3                                               | -  | -          | 3                                                 | 5  | 6.1 %      |

| Frequency of replanning decision (N-x fraction) |        |            | Frequency of fraction from (replan to start) |        |            |
|-------------------------------------------------|--------|------------|----------------------------------------------|--------|------------|
| N-x fraction of ART<br>decision                 | Counts | % of Total | N-x fraction of new<br>start                 | Counts | % of Total |
| 6                                               | 4      | 4.9 %      | 10                                           | 5      | 6.1 %      |
| 7                                               | 1      | 1.2 %      | 14                                           | 2      | 2.4 %      |
| 9                                               | 2      | 2.4 %      | 16                                           | 2      | 2.4 %      |
| 11                                              | 2      | 2.4 %      | 17                                           | 2      | 2.4 %      |
| 12                                              | 2      | 2.4 %      | 19                                           | 2      | 2.4 %      |
| 14                                              | 1      | 1.2 %      | 20                                           | 2      | 2.4 %      |
| 15                                              | 1      | 1.2 %      | 21                                           | 3      | 3.7 %      |
| 16                                              | 3      | 3.7 %      | 22                                           | 1      | 1.2 %      |
| 17                                              | 4      | 4.9 %      | 26                                           | 55     | 67.1 %     |
| 19                                              | 3      | 3.7 %      | 27                                           | 1      | 1.2 %      |
| 20                                              | 7      | 8.5 %      | 31                                           | 4      | 4.9 %      |
| 21                                              | 12     | 14.6 %     | 6                                            | 1      | 1.2 %      |
| 22                                              | 13     | 15.9 %     | 8                                            | 1      | 1.2 %      |
| 23                                              | 10     | 12.2 %     | 15                                           | 1      | 1.2 %      |
| 24                                              | 5      | 6.1 %      |                                              |        |            |
| 25                                              | 7      | 8.5 %      |                                              |        |            |
| 26                                              | 1      | 1.2 %      |                                              |        |            |
| 27                                              | 2      | 2.4 %      |                                              |        |            |
| 29                                              | 2      | 2.4 %      |                                              |        |            |

| Frequencies of ART replanning<br>Decision - week |        |            | Frequencies of ART replanning decision<br>week from replan to start |        |            |
|--------------------------------------------------|--------|------------|---------------------------------------------------------------------|--------|------------|
| Week of replanning<br>decision                   | Counts | % of Total | Week of new plan                                                    | Counts | % Of Total |
| 2                                                | 7      | 8.5 %      | 2                                                                   | 7      | 8.5 %      |
| 3                                                | 6      | 7.3 %      | 3                                                                   | 11     | 13.4 %     |
| 4                                                | 17     | 20.7 %     | 4                                                                   | 4      | 4.9 %      |
| 5                                                | 53     | 64.6 %     | 5                                                                   | 56     | 68.3 %     |
| 6                                                | 5      | 6.1 %      | 6                                                                   | 4      | 4.9 %      |
